# Supplementary material
Source: PubMed Central journal article supplement (PMC5719246)
Supplement: develop-144-153700-s1.pdf [file develop-144-153700-s1.pdf]

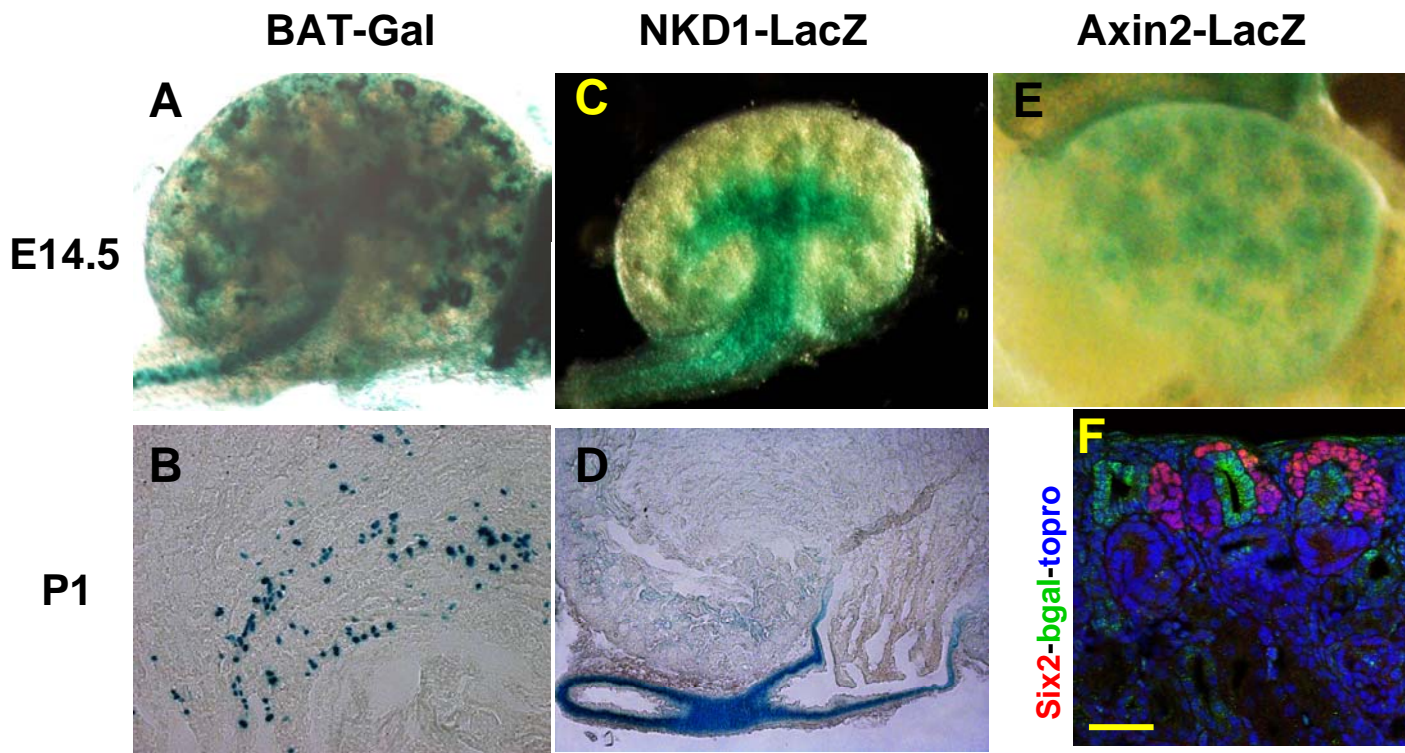

**Figure S1.** “Universal” beta-catenin reporters show disparate staining in the epithelial and stromal cells of the kidney. E14.5 wholemount and P1 sections of kidneys from BAT-Gal (A,B), NKD1-LacZ (C,D) and Axin2-LacZ (E,F) kidneys. In A-E, whole kidneys were stained with X-gal and photographed intact (A, C, E) or after sectioning (B,D). In F, an Axin2-LacZ kidney was sectioned and stained with antibodies to Beta-galactosidase (bgal, green), Six2 (red) and Topro (blue). Scale bar indicates 50 μm.

**A**

**Lef/Tcf binding site, Canonical Myc binding site, STAT1 binding site, STAT3 binding site**

1 AGAAGAGAGGGCTTAGGGATTATGGCCAGTCTTGGCTACAAAAGATCTAGTCTCAAAAAAAAAATTAAATAAAGTAACAAATAGGTATTTGGTT  
 101 AACCCAGGAAGTGATCTTTTACACCAAAGTCTATGAAATAATTGAGACCGAGGTTGGCTTGGGAGCTCCATCCCTCTCAGGTTAGGTTCTCTGCTACTTTG  
 201 TGTGTTTCTGTTGAATTTACAATACTGCATCCTCGGCATCTCTTCTCTCTGTGTAGCCTTGTATTCCACCCACCTGAAGGAACTGTCTCCTTCACT  
 301 CAGCATCGTCCCCCTGCATAGAGCCTGTCTCCTGGGTCTGACATTGCTCTATGGGTGTTTCATCTCTTCTCTCTGTGTAGCCTTGTATTCCACCCACCTGA  
 401 TGGAACTGTCTCCTTCACTCAGCATCGTCCCCCTGCATAGAGCCTGTCTCCTGGGTCTGACATTGCTCTATGGGTGTTTCATCTCTTCTCTCTGTGTAGCCT  
 501 TGTATTCCACCCACCTGAAGGAACTGTCTCCTTCACTCAGCATCGTCCCCCTGCATAGAGCCTGTCTCCTGGGTCTGACGTTGCTCTATGGGTGTTGTCC  
 601 AATCCACCCTAAGATCTCTGTGCTGCCCGATTGGAGTTGGATTCCAAGCAGCTTGGTCACGAGCAAGGCCAATGAACCTGCCAGGGCCCCAGCGGGGAACG  
 701 TGGGGTTCCCTGCTGTTCTGGTGTGCACTGAAGCTTGCCCGTCTTGTATGTTAATGTGCTCAGGACACACTGCCGATCCTGTTGCTCCGTCTTCATGGT  
 801 TTAATCAGTGTGTGAGAATAATCAGCGTGTACAGGAAGACATAGCTTTGAAAAGTCTTTGAGGAAATTTCTCTCCAGGAAACCCAGGAGCTGATGGGCCCA  
 901 GCATGTGTTGACAGCCTGCATGCTCTGATTATGGCCATCAGTAGGGGACACTCTGACACTTCTTGGAGAAGGGTACAAGAGGGCAAGATGCCACAGAGCC  
 1001 GCAAGCCATTCCTCACTGGGGTGAAGGCGATCTGCCGACACTGTGTTTGTATGGTGGCCACGGGATGCTTGGTGTCTGTGAGAAGGATGGAAACAGGCAA  
 1101 GCCACCCTCGGAAGTGGCAGGTTTGCATTCCTTGGTTTCTATTGTGTTTCATGTCCACAGCCCTTCAAGCCTGGGCAGGTGGTGTGACGGTGGCCAGCTCTGC  
 1201 AGCGCCAGACTCTCAGAATGGGATGTAATGTGGTGTGTTGATGTTCCAGGAACCCAGATCCCAGCTATACCCAAACTGGACAACGGGCTCTTTATACAGTTAA  
 1301 ATCTTAGCCATAGCCAGTGTGGACGTAACCTGACTCCCTCAGTTCCAGCTCACAGGAGGTTTTGCATGACTCATTTCACAGTTTTAGAAATTCCACC  
 1401 CAGGAAAGCCCTGCTGGTATGTTGAGGGACTCTACATTACAACTGGGAAATGGAGGCTCATAACAAGGTAGAGTTGGCTCAACACACACAGTTAGGGAAT  
 1501 AAGGGCAGATGGAATGCCCTGTTCCTCCATAGAAACATCTGAGCTGGCCAGGCCTGAGACATTGGGGTATAGAAAGCAGAGAGTGAGGTGTGAGAGAACA  
 1601 TGAGAGGTGCAGGAAATAAGAGTCTGCACGTGGCATGCGCCACGATGTGGAAAGAGCAGACTGAGACTGAAGCACCAGGTGGAGAGCTTTCTAGAGGAGG  
 1701 TGATACCCATACCAGGCTCTCCTACAGAATAGGTTGCATCTGCAGGCAGTGCATCTAGCCAACCTTGGCAGCACTGGGCAGTTGGTCCATCCAGGGCAAGCC  
 1801 TGAGACCGTGGCAGGAGCAGTACCTTCTAGACTCAGAGTGAAGTGTGAGACAGGTGTCTGCTTACAGGGACTGTGCACGACTTCCCTCCACCTACCTATGC  
 1901 AGATACTGTCCCCAGTGTGCATAGACTATCACCAGCGTTGGGCCCTGTGGAATATTTTGTGTGGACACTAGGTACAGGATCCAGAGATCTTAGGGAAT  
 2001 CGTTTCATGGAAGGAGTTTCCAGCTCTACCCCTACAGGCCTACTAGAAGCCTAGTCTAGGGGAGGATTCTAGATCACTGACCTCGCGGGTCTAGCTTCATTA  
 2101 ATACACCCGTTTTTCCAGATTATAGCATAAGTGAAGGATCAAGACAGAATGGCTTCTGAAGGAGGAGGCTTACATCCCCACTGTGCTCTGGGCCATG  
 2201 CTGTGAGATTAGTGTATTTCCTAGAATGGGGCATCCACAGGCTGTGTGTCAGGAACTCACTGTGCAGTTAACTGATGGCAGTGACCTGCCATCACAGC  
 2301 TGACCTCATCGCCATCTCCCTCCCAGACCCCTGGCTGGCTCAAGGCTCAACATGACCCTTCTTTGAAACCCATTGCTGTCTTTGATGGCAGCTAAGGCTT  
 2401 CAGACCAAATGCAACAGTTTGTGTAAGAGCAGATGAAAGTCCGGCAGCCTTTCATTTTGCATTCCAGTCACTTTGATCATGTGATATGGCTGAGTGGAG  
 2501 GATGGAAGCATGCCTGTGTCTTCTTTCCCTACAATTGATGTAGGCATGCCTGAATGCTTCCAGTCACTCTGAGATGGACCTGGCTCTGTGCTCCTGGATT  
 2601 CTATTTCTCCTTGGGATTGAGTTTCTTTTCCAGCAGTGGCCCCAAGTGTGGCTCTGGTGTGATTGTCTTCTGAGCACTGAGGGAAAATGACCTTCGACAC  
 2701 ACCACTCCACCATACCAAGCACCTTTGTGGAGCACTACAGAGGGGTTGAAAGTGAAGTCAAGACCTTGGAGTGAAGTGTCCCTGAACACATTTAGGGTC  
 2801 TATTTCTGGTGTAAATTTTATGATCTTTGTGGGGTAGGAACAGGTTGCTGTGAGGAACACCAGATGCGTCTTTTATCCCTGGATGGACCATAATTGGGTA  
 2901 ACAAATTAAGAAGTCCATAAGCACCTCCTCTTTT

**B**

**Lef/Tcf binding sites**

**Myc binding site**

841 ATAGCTTTGAAAAGTCTTTGAGGAAATTCTCTCCAGGAAACCCAGGAGCTGATGGGCCAGCATGTGGTG 910  
 CaTaGAA CaTaGA gATcaG

**Lef/Tcf binding sites**

2361 CTTTGAAACCCATTGCTGTCTTTGATGGCAGCTAAGGCTTCAGACCAAATGCAACAGTTTGTGTAAGAGC 2430  
 CTacGAA CTacGAT

**Lef/Tcf binding sites Myc binding site**

2431 AGATGAAAGTCGGGCAGCCTTTTCATTTTGCATTCCAGTCACTTTGATCATGTGATATGG 2490  
 CgTaGATgATcaG

**Figure S2.** Sequence of the Fam19a5-GRE. A. Sequence of the portion of intron 2 that was made to engineer the Fam19a5-GRE line. Consensus Lef/Tcf binding sites are in red, canonical Myc binding sites are in blue, STAT1 binding sites are in fuschia and the STAT3 binding sites are in green. The portion used to generate the Fam19a5-GRE-1-2160 is not underlined while the sequence used to generate the Fam19a5-GRE-2161-2934 is underlined. B. Sequence surrounding the Lef/Tcf (red) and Myc binding sites (blue). The mutated sequence used for the luciferase assays is shown below each site.

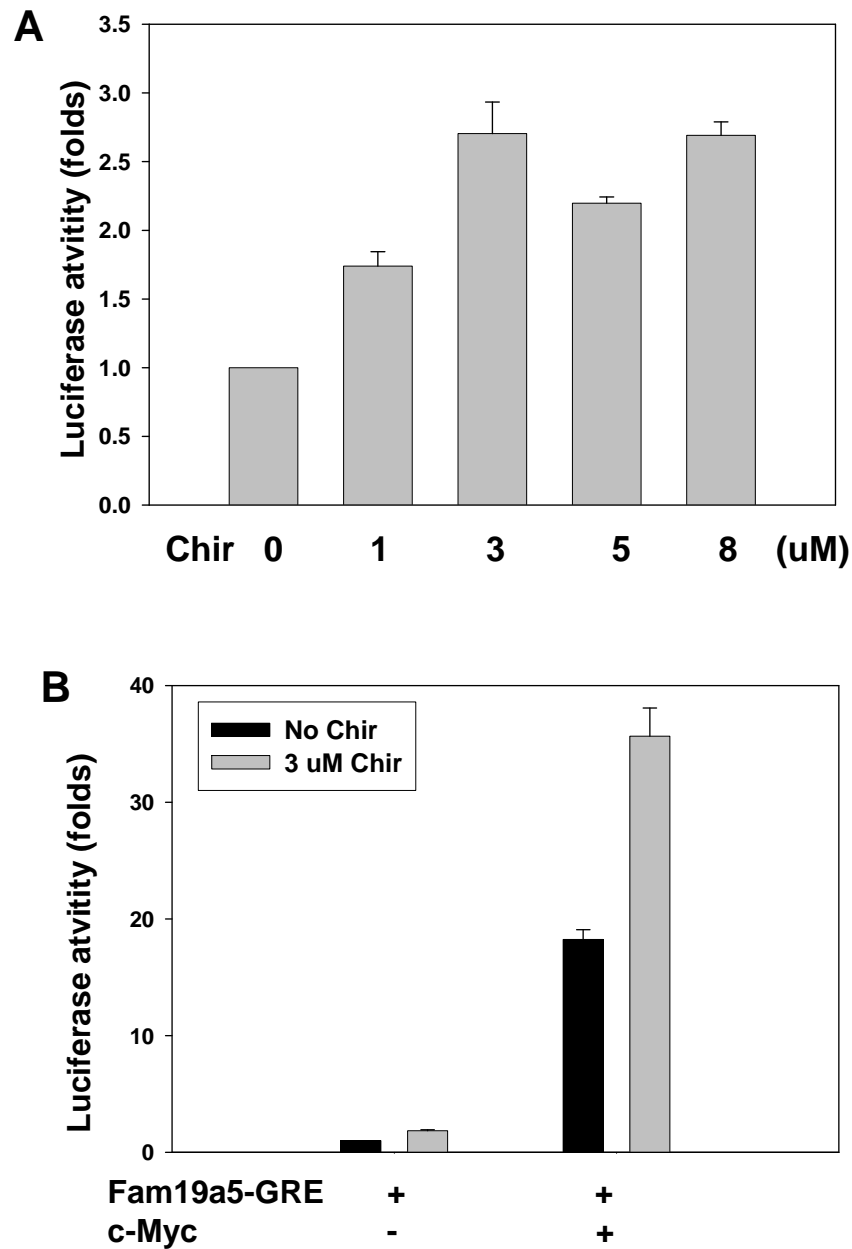

**Figure S3.** Chir stimulates Fam19a5-GRE reporter activity in vitro. (A) HEK 293 cells were transfected with a Fam19a5-GRE luciferase reporter and treated with Chir at different concentrations. (B) Graph of luciferase activity from HEK 293 cells transfected with or without a full length c-Myc expression plasmid as indicated. 24 hours after transfection, the media was replaced with fresh media (black bars) or media supplemented with 3uM Chir (gray bars) and luciferase activity was measured 18hrs later. Data are represented as mean  $\pm$  SEM.

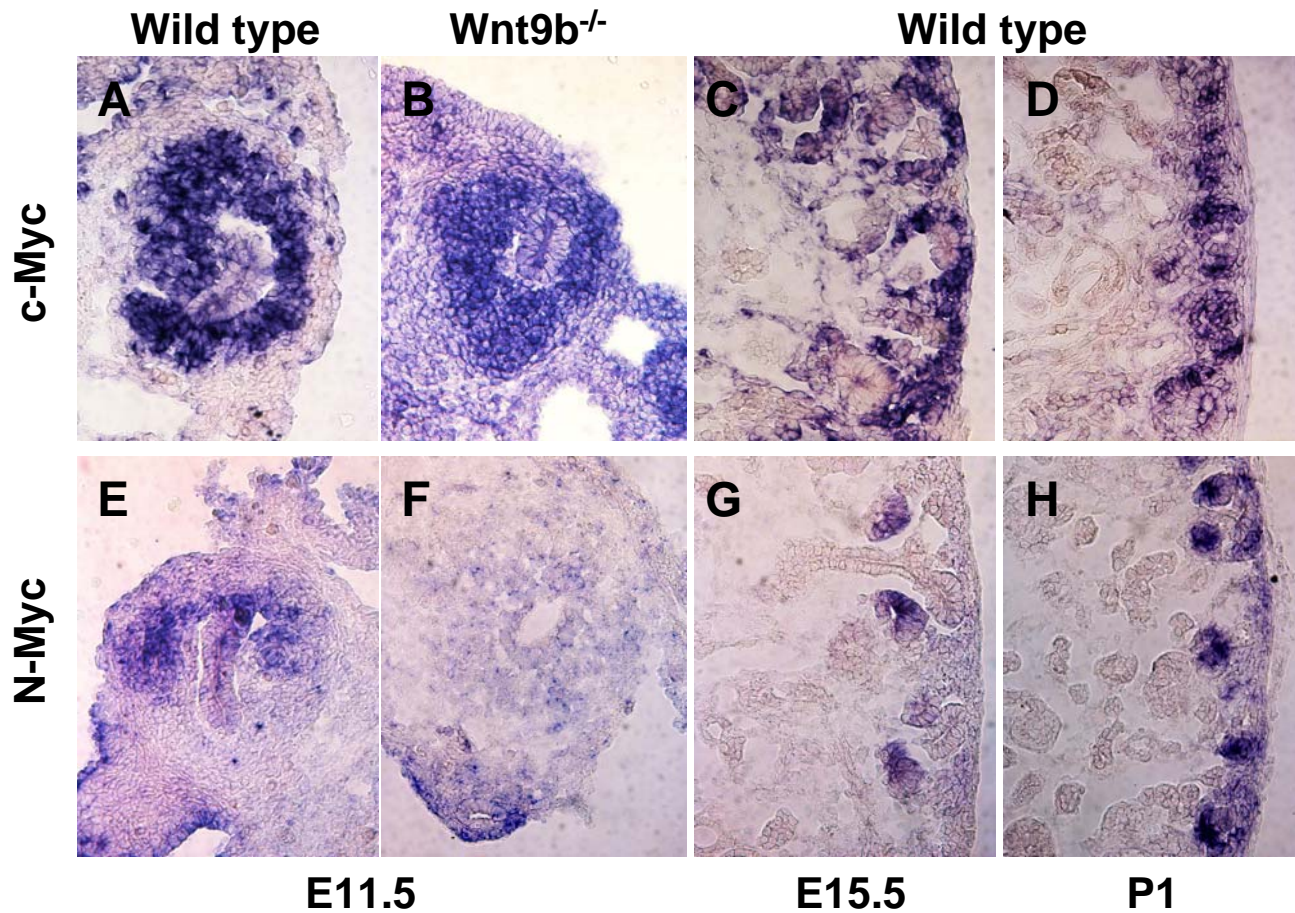

**Figure S4.** Expression and regulation of c- and N-Myc. Sections through E11.5 (A,B,E,F), E15.5 (C,G) and P1 (D,H) wild type (A,C,D,E,G,H) or Wnt9b mutant (B,F) kidneys stained with antisense probes to c-Myc (A-D) or N-Myc (E-H). All images are 40x.

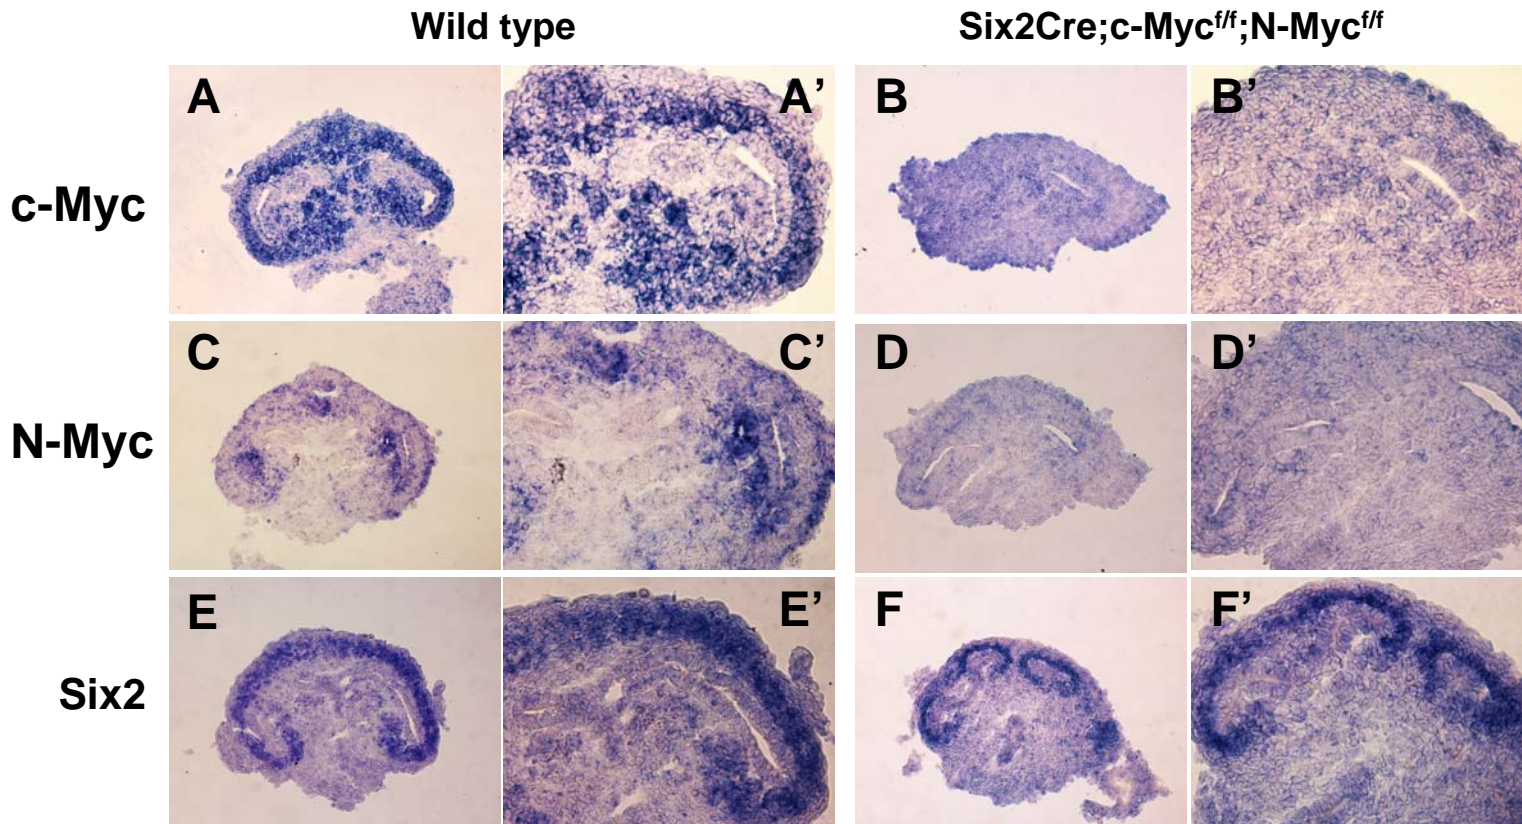

**Figure S5.** Six2Cre efficiently ablates c- and N-Myc by e12.5. Sections through E12.5 wild type ( $c\text{-Myc}^{\text{flox/flox}};N\text{-Myc}^{\text{flox/flox}}$  in A,C and E) and mutant ( $\text{Six2Cre};c\text{-Myc}^{\text{flox/flox}};N\text{-Myc}^{\text{flox/flox}}$ , B,D,F) kidneys hybridized with antisense mRNA probes to c-Myc (A,B), N-Myc (C,D) and Six2 (E,F). A-F, 20x. A'-F', 40x. Note that c- and N-Myc expressions are greatly reduced in mutant kidneys while Six2 is unaffected.

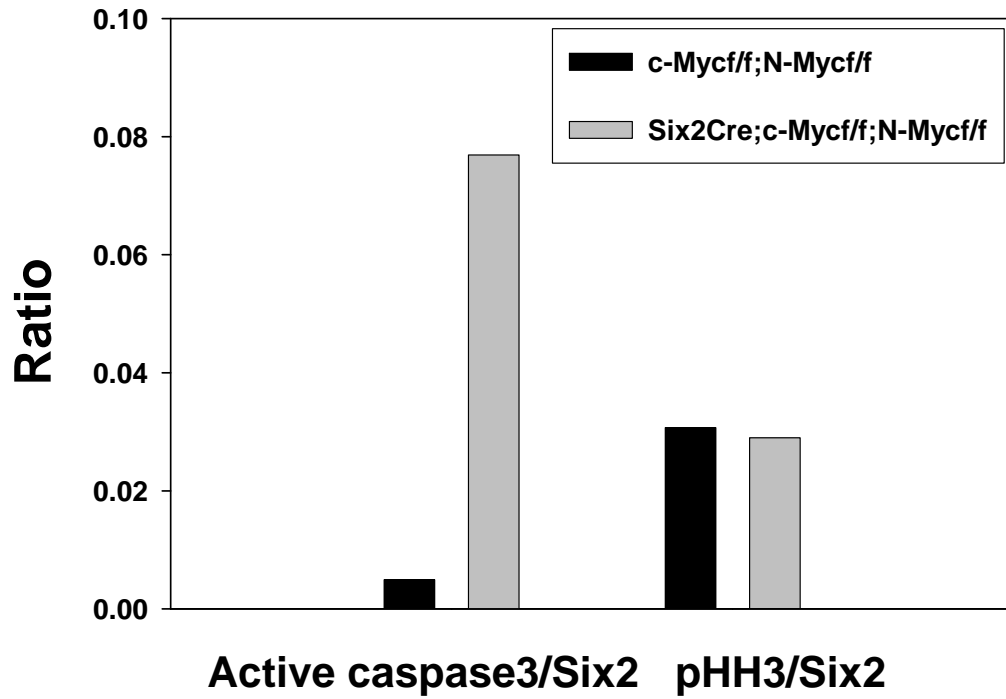

**Figure S6.** NPCs of c/N-Myc double mutants have increased rates of apoptosis. Sections from E15.5 wild type (c-Myc<sup>flox/flox</sup>;N-Myc<sup>flox/flox</sup>) and mutant (Six2Cre;c-Myc<sup>flox/flox</sup>;N-Myc<sup>flox/flox</sup>) kidneys were stained with active caspase3, pHH3 and Six2. The ratios of apoptotic (Active caspase3/Six2) and renewing (pHH3/Six2) cells are presented.
